# Supplementary material for: Unprecedented transformation from cyclized zwitterionic oxazolidine derivatives to corresponding non-zwitterionic aromatic amides via Vilsmeier reagent in a one-pot reaction: optical property and crystallography
Source: Royal Society of Chemistry journal article supplement (doi:10.1039/d2nj00591c), 2022-01-01
Supplement: d2nj00591c1.pdf [file d2nj00591c1.pdf]

## Electronic Supplementary Information for

### Unprecedented transformation from cyclized zwitterionic oxazolidine derivatives to corresponding non-zwitterionic aromatic amides *via* Vilsmeier reagent in a one-pot reaction: optical property and crystallography

Anwarhussaini SD<sup>a</sup>, Anuradha Mohitkar <sup>a</sup> and Subbalakshmi Jayanty <sup>a\*</sup>

<sup>a</sup>Department of Chemistry, Birla Institute of Technology and Science, Pilani-Hyderabad Campus, Jawahar Nagar, Kapra Mandal, Medchal. Dist. Hyderabad - 500078, Telangana State, India

Correspondence e-mail: [jslakshmi@hyderabad.bits-pilani.ac.in](mailto:jslakshmi@hyderabad.bits-pilani.ac.in)

| Contents                                                                                            | Page No. |
|-----------------------------------------------------------------------------------------------------|----------|
| <b>Fig. S1</b> Molecular Ortep diagrams of (a) [1], (b) [2] and (c) [3]                             | S2       |
| <b>Table S1</b> Basic crystallographic data of [1], [2] and [3]                                     | S3       |
| <b>Table S2-S4</b> Detailed crystallographic tables for [1], [2] and [3]                            | S4-S10   |
| <b>Fig. S2 to S5</b> Present the <sup>1</sup> H NMR and <sup>13</sup> C NMR of compounds [1] to [4] | S11-S14  |
| <b>Fig. S6</b> Displays molecular orientation along the axis <i>ob</i> for [2]                      | S15      |
| <b>Fig. S7</b> Supramolecular assemblies in [1], [2] and [3]                                        | S15      |
| <b>Table S5-Table S7</b> Provides details of absorption and emission study for [1], [3],[4]         | S16-S17  |
| <b>Fig. S8</b> Decreased emission intensity on the addition of 0 to 90% water fraction              | S18      |
| <b>Table S8</b> X, Y coordinate values from the chromaticity output diagrams for [1] to [4]         | S18      |
| <b>Fig. S9</b> Fluorescence lifetime decay of compounds [1] to [4] in (a) solids (b) solutions      | S19      |
| <b>Fig. S10</b> DSC plots of all four pure solids [1], [2], [3] and [4]                             | S19      |

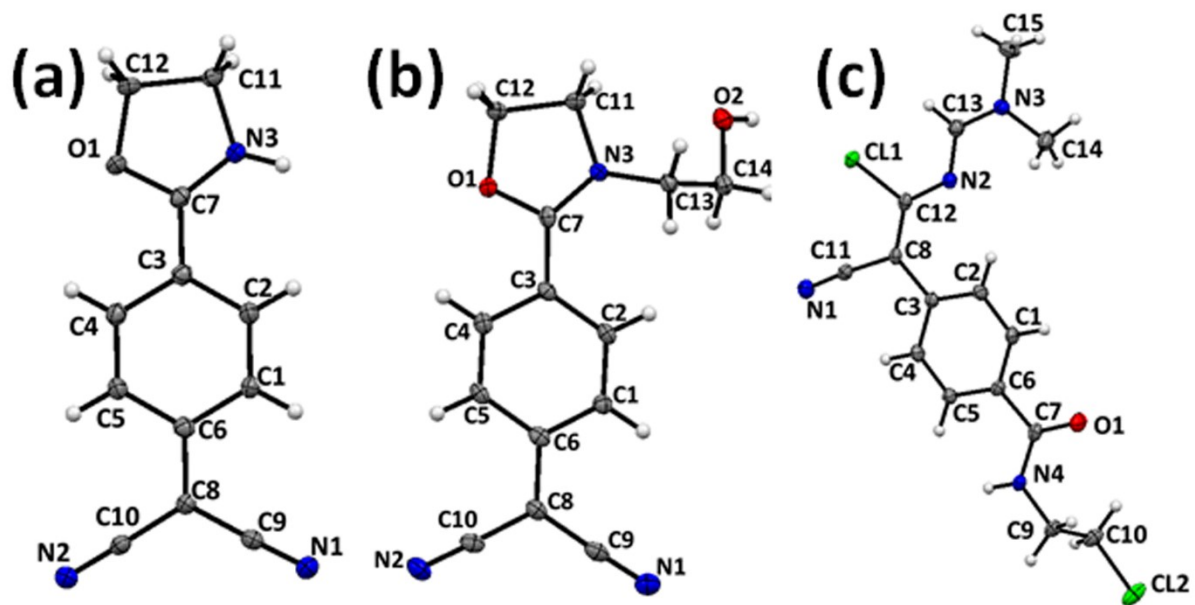

**Fig. S1** Molecular Ortep diagrams of obtained compounds (a) [1], (b) [2] and (c) [3] indicating 50% thermal ellipsoids.

**Table S1** Basic crystallographic data of obtained compounds [1], [2] and [3].

| Compound                                      | [1]                                                           | [2]                                                           | [3]                                                              |
|-----------------------------------------------|---------------------------------------------------------------|---------------------------------------------------------------|------------------------------------------------------------------|
| CCDC No.                                      | 1914412                                                       | 1901738                                                       | 1935036                                                          |
| Empirical formula                             | C <sub>12</sub> H <sub>9</sub> N <sub>3</sub> O               | C <sub>14</sub> H <sub>13</sub> N <sub>3</sub> O <sub>2</sub> | C <sub>15</sub> H <sub>16</sub> N <sub>4</sub> Cl <sub>2</sub> O |
| Formula weight                                | 172.20                                                        | 255.27                                                        | 177.26                                                           |
| Temperature/K                                 | 293(2)                                                        | 293(2)                                                        | 293(2)                                                           |
| Crystal system                                | triclinic                                                     | monoclinic                                                    | monoclinic                                                       |
| Space group                                   | P-1                                                           | P21/n                                                         | P21/c                                                            |
| a, b, c (Å)                                   | 6.3852(3),7.1557(6),11.6848(3)                                | 6.15037(8),15.2072(2),13.27838(19)                            | 12.5950(7),16.6928(8),7.6628(5)                                  |
| α, β, γ (°)                                   | 93.970(5),93.665(3),111.132(6)                                | 90.00,101.9346(13), 90.00                                     | 90.00,99.088(5),90.00                                            |
| Volume/Å <sup>3</sup>                         | 494.52(5)                                                     | 1215.08(3)                                                    | 1590.85(15)                                                      |
| Z                                             | 2                                                             | 4                                                             | 4                                                                |
| Density (ρ) calculated (g/cm <sup>3</sup> )   | 1.156                                                         | 1.395                                                         | 1.295                                                            |
| Absorption coefficient (μ, mm <sup>-1</sup> ) | 0.596                                                         | 0.788                                                         | 0.124                                                            |
| F(000)                                        | 182.0                                                         | 536.0                                                         | 654.0                                                            |
| Crystal size/mm <sup>3</sup>                  | 0.08 × 0.05 × 0.03                                            | 0.4 × 0.1 × 0.05                                              | 0.5 × 0.05 × 0.03                                                |
| Radiation                                     | CuKα (λ = 1.54184)                                            | CuKα (λ = 1.54184)                                            | MoKα (λ = 0.71073)                                               |
| 2θ range for data collection/°                | 7.618 to 159.09                                               | 8.952 to 148.188                                              | 6.334 to 61.994                                                  |
| Index ranges                                  | -8 ≤ h ≤ 8, -8 ≤ k ≤ 9, -14 ≤ l ≤ 8                           | -7 ≤ h ≤ 7, -18 ≤ k ≤ 13, -16 ≤ l ≤ 14                        | -16 ≤ h ≤ 16, -24 ≤ k ≤ 23, -10 ≤ l ≤ 11                         |
| Reflections collected                         | 5730                                                          | 6120                                                          | 17497                                                            |
| Independent reflections                       | 2078 [R <sub>int</sub> = 0.0271, R <sub>sigma</sub> = 0.0269] | 2399 [R <sub>int</sub> = 0.0107, R <sub>sigma</sub> = 0.0090] | 4485 [R <sub>int</sub> = 0.0428, R <sub>sigma</sub> = 0.0408]    |
| Data/restraints/parameters                    | 2078/0/65                                                     | 2399/0/173                                                    | 4485/0/201                                                       |
| Goodness-of-fit on F2                         | 1.171                                                         | 1.045                                                         | 1.155                                                            |
| Final R indexes [I ≥ 2σ (I)]                  | R1 = 0.1276, wR2 = 0.3834                                     | R1 = 0.0332, wR2 = 0.0851                                     | R1 = 0.0527, wR2 = 0.1460                                        |
| Final R indexes [all data]                    | R1 = 0.1314, wR2 = 0.3849                                     | R1 = 0.0337, wR2 = 0.0855                                     | R1 = 0.0717, wR2 = 0.1547                                        |
| Largest diff. peak/hole /e Å <sup>-3</sup>    | 1.04/-0.64                                                    | 0.19/-0.29                                                    | 0.58/-0.62                                                       |

**Table S2a** Fractional Atomic Coordinates ( $\times 10^4$ ) and Equivalent Isotropic Displacement Parameters ( $\text{\AA}^2 \times 10^3$ ) for compound **[1]**.  $U_{\text{eq}}$  is defined as 1/3 of the trace of the orthogonalised  $U_{\text{ij}}$  tensor.

| Atom | x        | y        | z       | U(eq)    |
|------|----------|----------|---------|----------|
| O1   | 9769(6)  | 8995(6)  | 1218(3) | 18.6(8)  |
| N3   | 10934(7) | 9024(7)  | 3026(4) | 16.6(9)  |
| N2   | -2938(7) | 2624(7)  | 1045(4) | 21.0(10) |
| N1   | -1027(8) | 2225(7)  | 4686(4) | 22.3(11) |
| C7   | 9226(8)  | 8426(7)  | 2244(4) | 14.4(10) |
| C4   | 5274(9)  | 6662(8)  | 1432(4) | 16.9(11) |
| C9   | -556(9)  | 2896(8)  | 3822(5) | 17.7(11) |
| C3   | 6922(8)  | 7283(7)  | 2389(4) | 15.4(10) |
| C8   | 64(9)    | 3684(8)  | 2774(4) | 16.4(10) |
| C6   | 2358(8)  | 4952(8)  | 2644(4) | 15.4(10) |
| C10  | -1599(9) | 3092(8)  | 1826(4) | 17.0(11) |
| C2   | 6212(9)  | 6769(8)  | 3484(4) | 17.6(11) |
| C5   | 3064(9)  | 5542(8)  | 1561(4) | 17.1(11) |
| C1   | 4000(9)  | 5640(8)  | 3603(4) | 16.3(10) |
| C11  | 13040(8) | 10223(8) | 2561(4) | 16.4(10) |
| C12  | 12204(8) | 10191(8) | 1296(4) | 17.4(11) |

**Table S2b** Anisotropic Displacement Parameters ( $\text{\AA}^2 \times 10^3$ ) for Compound **[1]**. The Anisotropic displacement factor exponent takes the form:  $-2\pi^2[h^2a^2U_{11}+2hka*b*U_{12}+\dots]$ .

| Atom | U11      | U22   | U33      | U23     | U13      | U12     |
|------|----------|-------|----------|---------|----------|---------|
| O1   | 13.4(18) | 26(2) | 13.9(18) | 6.1(15) | 1.2(13)  | 3.9(15) |
| N3   | 15(2)    | 21(2) | 13(2)    | 3.4(16) | 1.5(16)  | 5.2(17) |
| N2   | 14(2)    | 30(3) | 16(2)    | 3.3(18) | -0.2(17) | 4.5(18) |
| N1   | 17(2)    | 32(3) | 15(2)    | 6.2(19) | 3.2(17)  | 4.6(19) |
| C7   | 17(2)    | 15(2) | 13(2)    | 4.5(18) | 4.6(18)  | 8.1(19) |
| C4   | 20(3)    | 18(2) | 13(2)    | 3.5(19) | 2.0(19)  | 7(2)    |
| C9   | 14(2)    | 18(2) | 19(3)    | 1(2)    | -2.4(19) | 3.6(19) |
| C3   | 16(2)    | 14(2) | 17(2)    | 3.0(18) | 2.1(19)  | 6.2(19) |
| C8   | 15(2)    | 20(2) | 14(2)    | 4.4(19) | 1.8(18)  | 5(2)    |
| C6   | 14(2)    | 16(2) | 17(2)    | 2.3(19) | 1.0(19)  | 6.2(19) |
| C10  | 16(2)    | 19(2) | 16(3)    | 6.4(19) | 6(2)     | 4(2)    |
| C2   | 16(2)    | 20(3) | 15(2)    | 2.3(19) | 0.2(19)  | 5(2)    |
| C5   | 16(2)    | 21(3) | 14(2)    | 2.6(19) | -0.5(19) | 7(2)    |
| C1   | 17(2)    | 21(3) | 11(2)    | 5.0(19) | 3.2(18)  | 7(2)    |
| C11  | 14(2)    | 16(2) | 19(3)    | 2.9(19) | 3.8(19)  | 5.0(19) |
| C12  | 12(2)    | 21(3) | 18(3)    | 4(2)    | 3.8(19)  | 3.5(19) |

**Table S2c** Bond Lengths for Compound [1].

| Atom | Atom | Length/Å | Atom | Atom | Length/Å |
|------|------|----------|------|------|----------|
| O1   | C7   | 1.320(6) | C9   | C8   | 1.404(7) |
| O1   | C12  | 1.473(6) | C3   | C2   | 1.414(7) |
| N3   | C7   | 1.300(7) | C8   | C6   | 1.443(7) |
| N3   | C11  | 1.472(6) | C8   | C10  | 1.412(7) |
| N2   | C10  | 1.152(7) | C6   | C5   | 1.412(7) |
| N1   | C9   | 1.158(7) | C6   | C1   | 1.414(7) |
| C7   | C3   | 1.430(7) | C2   | C1   | 1.373(7) |
| C4   | C3   | 1.413(7) | C11  | C12  | 1.535(7) |
| C4   | C5   | 1.373(7) |      |      |          |

**Table S2d** Bond Angles for compound [1].

| Atom | Atom | Atom | Angle/°  | Atom | Atom | Atom | Angle/°  |
|------|------|------|----------|------|------|------|----------|
| C7   | O1   | C12  | 108.9(4) | C9   | C8   | C10  | 117.8(5) |
| C7   | N3   | C11  | 111.9(4) | C10  | C8   | C6   | 120.8(5) |
| O1   | C7   | C3   | 119.0(4) | C5   | C6   | C8   | 121.8(5) |
| N3   | C7   | O1   | 113.5(4) | C5   | C6   | C1   | 117.3(5) |
| N3   | C7   | C3   | 127.5(5) | C1   | C6   | C8   | 121.0(5) |
| C5   | C4   | C3   | 120.8(5) | N2   | C10  | C8   | 179.2(6) |
| N1   | C9   | C8   | 178.3(6) | C1   | C2   | C3   | 120.7(5) |
| C4   | C3   | C7   | 120.5(5) | C4   | C5   | C6   | 121.5(5) |
| C4   | C3   | C2   | 118.0(5) | C2   | C1   | C6   | 121.6(5) |
| C2   | C3   | C7   | 121.5(5) | N3   | C11  | C12  | 101.2(4) |
| C9   | C8   | C6   | 121.3(5) | O1   | C12  | C11  | 104.5(4) |

**Table S2e** Hydrogen Atom Coordinates ( $\text{Å} \times 10^4$ ) and Isotropic Displacement Parameters ( $\text{Å}^2 \times 10^3$ ) for Compound [1].

| Atom | x        | y        | z       | U(eq) |
|------|----------|----------|---------|-------|
| H3   | 10844.24 | 8751.89  | 3730.74 | 20    |
| H4   | 5692.59  | 7017.16  | 706.28  | 20    |
| H2   | 7254.14  | 7199.99  | 4131.13 | 21    |
| H5   | 2008.35  | 5162.42  | 919.57  | 20    |
| H1   | 3570.71  | 5320.82  | 4332.36 | 20    |
| H11A | 14156.92 | 9600.3   | 2630.74 | 20    |
| H11B | 13667.46 | 11583.6  | 2939.61 | 20    |
| H12A | 12472.01 | 11545.19 | 1094.01 | 21    |
| H12B | 12957.75 | 9566.26  | 786.25  | 21    |

**Table S3a** Fractional Atomic Coordinates ( $\times 10^4$ ) and Equivalent Isotropic Displacement Parameters ( $\text{\AA}^2 \times 10^3$ ) for compound [2].  $U_{\text{eq}}$  is defined as 1/3 of the trace of the orthogonalised  $U_{\text{ij}}$  tensor.

| Atom | x           | y         | z         | U(eq)     |
|------|-------------|-----------|-----------|-----------|
| O1   | 706.9(12)   | 5716.7(5) | 1053.3(6) | 16.31(18) |
| O2   | -1523.0(13) | 5797.5(5) | 4264.4(6) | 18.64(19) |
| N3   | 1045.6(14)  | 5535.4(6) | 2720.9(7) | 13.5(2)   |
| N2   | 11171.2(17) | 8282.4(7) | 580.0(8)  | 22.4(2)   |
| N1   | 10930.7(17) | 9053.9(7) | 3779.1(8) | 24.9(2)   |
| C6   | 7444.1(17)  | 7603.8(7) | 2112.5(8) | 14.5(2)   |
| C3   | 3702.8(17)  | 6504.4(7) | 2057.3(8) | 14.0(2)   |
| C2   | 4508.8(17)  | 7041.9(7) | 2916.2(8) | 14.6(2)   |
| C1   | 6325.1(18)  | 7575.3(7) | 2942.9(8) | 15.0(2)   |
| C5   | 6586.1(18)  | 7076.8(7) | 1242.6(8) | 15.3(2)   |
| C7   | 1830.6(17)  | 5921.1(7) | 1987.9(8) | 13.6(2)   |
| C4   | 4760.8(18)  | 6549.2(7) | 1212.9(8) | 15.4(2)   |
| C13  | 1969.8(18)  | 5517.6(7) | 3832.4(8) | 14.8(2)   |
| C8   | 9363.2(18)  | 8153.2(7) | 2151.4(9) | 15.8(2)   |
| C11  | -962.5(18)  | 5018.5(8) | 2284.4(8) | 17.5(2)   |
| C14  | 701.2(19)   | 6105.6(8) | 4428.7(8) | 17.5(2)   |
| C10  | 10384.8(18) | 8227.8(7) | 1298.3(9) | 17.2(2)   |
| C12  | -882.6(18)  | 5013.8(8) | 1145.9(8) | 17.5(2)   |
| C9   | 10256.8(18) | 8651.2(8) | 3039.3(9) | 18.1(2)   |

**Table S3b** Anisotropic Displacement Parameters ( $\text{\AA}^2 \times 10^3$ ) for Compound [2]. The Anisotropic displacement factor exponent takes the form:  $-2\pi^2[h^2a^2U_{11}+2hka*b*U_{12}+\dots]$ .

| Atom | U11     | U22     | U33     | U23     | U13    | U12     |
|------|---------|---------|---------|---------|--------|---------|
| O1   | 16.4(4) | 20.3(4) | 12.6(4) | -0.7(3) | 3.6(3) | -3.3(3) |
| O2   | 17.2(4) | 21.6(4) | 19.2(4) | -1.7(3) | 8.7(3) | 1.0(3)  |
| N3   | 13.5(4) | 14.7(4) | 13.2(4) | -0.5(3) | 4.3(3) | -1.8(3) |
| N2   | 19.6(5) | 26.1(5) | 23.5(5) | 4.7(4)  | 8.7(4) | -1.8(4) |
| N1   | 21.7(5) | 28.9(6) | 24.2(5) | -1.4(4) | 4.9(4) | -6.2(4) |
| C6   | 13.8(5) | 12.8(5) | 17.4(5) | 4.3(4)  | 4.4(4) | 3.1(4)  |
| C3   | 13.5(5) | 14.0(5) | 15.0(5) | 2.4(4)  | 4.3(4) | 1.5(4)  |
| C2   | 15.6(5) | 16.0(5) | 13.6(5) | 2.1(4)  | 6.3(4) | 1.7(4)  |
| C1   | 16.0(5) | 14.8(5) | 14.5(5) | 0.1(4)  | 3.6(4) | 0.6(4)  |
| C5   | 16.7(5) | 16.4(5) | 14.8(5) | 2.6(4)  | 7.7(4) | 2.1(4)  |
| C7   | 14.1(5) | 14.2(5) | 13.2(5) | -0.4(4) | 4.2(4) | 3.6(4)  |
| C4   | 17.2(5) | 15.5(5) | 13.9(5) | 0.7(4)  | 4.3(4) | 1.9(4)  |
| C13  | 15.8(5) | 16.7(5) | 12.3(5) | 2.2(4)  | 3.9(4) | -0.4(4) |
| C8   | 14.3(5) | 16.7(5) | 17.3(5) | 2.6(4)  | 5.1(4) | 0.3(4)  |
| C11  | 16.4(5) | 19.6(5) | 17.0(5) | -2.1(4) | 4.8(4) | -5.7(4) |
| C14  | 20.0(6) | 18.6(5) | 15.3(5) | -1.4(4) | 6.5(4) | -2.3(4) |
| C10  | 13.6(5) | 15.7(5) | 22.0(6) | 3.9(4)  | 3.1(4) | 0.0(4)  |
| C12  | 16.5(5) | 18.8(5) | 17.7(6) | -2.3(4) | 4.9(4) | -4.6(4) |
| C9   | 13.4(5) | 18.8(6) | 23.0(6) | 4.9(5)  | 5.6(4) | -0.5(4) |

**Table S3c** Bond Lengths for Compound [2].

| Atom | Atom | Length/Å   | Atom | Atom | Length/Å   |
|------|------|------------|------|------|------------|
| O1   | C7   | 1.3265(13) | C6   | C8   | 1.4383(15) |
| O1   | C12  | 1.4708(13) | C3   | C2   | 1.4074(15) |
| O2   | C14  | 1.4195(14) | C3   | C7   | 1.4413(15) |
| N3   | C7   | 1.3111(14) | C3   | C4   | 1.4095(15) |
| N3   | C13  | 1.4681(13) | C2   | C1   | 1.3751(15) |
| N3   | C11  | 1.4775(13) | C5   | C4   | 1.3737(15) |
| N2   | C10  | 1.1583(16) | C13  | C14  | 1.5135(15) |
| N1   | C9   | 1.1590(16) | C8   | C10  | 1.4089(16) |
| C6   | C1   | 1.4160(15) | C8   | C9   | 1.4134(16) |
| C6   | C5   | 1.4153(16) | C11  | C12  | 1.5226(15) |

**Table S3d** Bond Angles for compound [2].

| Atom | Atom | Atom | Angle/°    | Atom | Atom | Atom | Angle/°    |
|------|------|------|------------|------|------|------|------------|
| C7   | O1   | C12  | 108.59(8)  | O1   | C7   | C3   | 117.31(9)  |
| C7   | N3   | C13  | 128.99(9)  | N3   | C7   | O1   | 112.90(9)  |
| C7   | N3   | C11  | 110.67(9)  | N3   | C7   | C3   | 129.78(10) |
| C13  | N3   | C11  | 120.20(9)  | C5   | C4   | C3   | 120.95(10) |
| C1   | C6   | C8   | 121.14(10) | N3   | C13  | C14  | 112.38(9)  |
| C5   | C6   | C1   | 117.32(10) | C10  | C8   | C6   | 121.13(10) |
| C5   | C6   | C8   | 121.53(10) | C10  | C8   | C9   | 117.80(10) |
| C2   | C3   | C7   | 123.51(10) | C9   | C8   | C6   | 121.05(10) |
| C2   | C3   | C4   | 118.25(10) | N3   | C11  | C12  | 101.31(8)  |
| C4   | C3   | C7   | 118.23(10) | O2   | C14  | C13  | 108.02(9)  |
| C1   | C2   | C3   | 120.77(10) | N2   | C10  | C8   | 178.16(12) |
| C2   | C1   | C6   | 121.40(10) | O1   | C12  | C11  | 103.77(8)  |
| C4   | C5   | C6   | 121.24(10) | N1   | C9   | C8   | 177.87(12) |

**Table S3e** Hydrogen Atom Coordinates ( $\text{\AA} \times 10^4$ ) and Isotropic Displacement Parameters ( $\text{\AA}^2 \times 10^3$ ) for Compound [2].

| Atom | x        | y       | z       | U(eq) |
|------|----------|---------|---------|-------|
| H2   | -2241.01 | 6110.75 | 4578.79 | 28    |
| H2A  | 3804.61  | 7036.24 | 3472.15 | 18    |
| H1   | 6829.41  | 7924.74 | 3518.63 | 18    |
| H5   | 7270.82  | 7087.86 | 680.4   | 18    |
| H4   | 4215.28  | 6216.85 | 627.24  | 18    |
| H13A | 3509.59  | 5705.27 | 3957.19 | 18    |
| H13B | 1936.42  | 4918.82 | 4080.48 | 18    |
| H11A | -2298.58 | 5302.58 | 2403.75 | 21    |
| H11B | -875.26  | 4427.68 | 2565.14 | 21    |
| H14A | 1375.67  | 6087.27 | 5156.47 | 21    |
| H14B | 729.98   | 6708.38 | 4192.93 | 21    |
| H12A | -368.96  | 4450.55 | 943.54  | 21    |
| H12B | -2334.76 | 5138.13 | 723.43  | 21    |

**Table S4a** Fractional Atomic Coordinates ( $\times 10^4$ ) and Equivalent Isotropic Displacement Parameters ( $\text{\AA}^2 \times 10^3$ ) for compound **[3]**.  $U_{\text{eq}}$  is defined as 1/3 of the trace of the orthogonalised  $U_{\text{IJ}}$  tensor.

| Atom | x          | y          | z         | $U(\text{eq})$ |
|------|------------|------------|-----------|----------------|
| C11  | 4556.9(4)  | 1140.4(3)  | 4484.9(8) | 21.31(15)      |
| C12  | 10226.1(6) | 7633.1(4)  | 4155.7(9) | 31.61(18)      |
| C3   | 6664.3(19) | 663.2(14)  | 3599(3)   | 19.0(4)        |
| N4   | 6524.5(15) | 1444.6(12) | 3647(3)   | 17.1(4)        |
| O5   | 9114.1(15) | 5049.3(11) | 2349(3)   | 27.6(4)        |
| N6   | 7570.2(16) | 349.2(12)  | 3267(3)   | 19.1(4)        |
| C7   | 7728(2)    | -515.6(15) | 3185(4)   | 27.0(5)        |
| C8   | 6526.0(19) | 4671.8(14) | 3837(3)   | 19.1(5)        |
| N9   | 3632.9(18) | 3084.4(13) | 4984(3)   | 25.6(5)        |
| C10  | 8604(2)    | 6640.8(15) | 2821(3)   | 21.3(5)        |
| C11  | 4419.1(19) | 2830.5(14) | 4607(3)   | 18.4(4)        |
| C12  | 7143.3(19) | 3115.6(14) | 3185(3)   | 20.2(5)        |
| C13  | 6165.6(18) | 3238.4(14) | 3821(3)   | 15.6(4)        |
| C14  | 5626.9(18) | 1773.9(14) | 4041(3)   | 16.8(4)        |
| C15  | 9412(2)    | 6783.9(16) | 4471(3)   | 24.2(5)        |
| C16  | 8246.7(19) | 5201.7(14) | 2850(3)   | 18.3(4)        |
| N17  | 7930.3(16) | 5959.3(12) | 3077(3)   | 20.4(4)        |
| C18  | 7498.3(18) | 4546.2(14) | 3206(3)   | 16.2(4)        |
| C19  | 5878.5(19) | 4033.5(14) | 4135(3)   | 19.7(5)        |
| C20  | 5431.5(18) | 2582.1(14) | 4142(3)   | 16.1(4)        |
| C21  | 7788.2(19) | 3758.1(14) | 2892(3)   | 20.2(5)        |
| C22  | 8465(2)    | 849.9(17)  | 2939(4)   | 30.1(6)        |



**Table S4b** Anisotropic Displacement Parameters ( $\text{\AA}^2 \times 10^3$ ) for Compound [3]. The Anisotropic displacement factor exponent takes the form:  $-2\pi^2[h^2a^*2U_{11}+2hka^*b^*U_{12}+\dots]$ .

| Atom | U11      | U22      | U33      | U23      | U13      | U12      |
|------|----------|----------|----------|----------|----------|----------|
| C11  | 15.9(3)  | 18.3(3)  | 31.0(3)  | 2.1(2)   | 7.8(2)   | -3.1(2)  |
| C12  | 34.3(4)  | 33.0(4)  | 28.8(3)  | -4.5(3)  | 8.9(3)   | -19.4(3) |
| C3   | 18.6(11) | 19.6(11) | 19.6(11) | 0.4(9)   | 5.2(8)   | -1.2(9)  |
| N4   | 14.6(9)  | 17.8(9)  | 19.8(9)  | -0.8(7)  | 5.5(7)   | -0.5(7)  |
| O5   | 20.2(9)  | 23.5(9)  | 43.2(11) | -4.0(8)  | 18.2(8)  | -3.0(7)  |
| N6   | 18.1(10) | 15.8(9)  | 24.3(10) | -1.1(8)  | 6.3(8)   | 0.2(7)   |
| C7   | 32.7(14) | 18.9(11) | 31.6(14) | 0.6(10)  | 11.7(11) | 5.6(10)  |
| C8   | 15.2(10) | 16.4(10) | 26.9(12) | -1.1(9)  | 6.9(9)   | 0.5(8)   |
| N9   | 19.1(10) | 23.9(11) | 36.5(12) | 2.8(9)   | 12.1(9)  | 1.0(8)   |
| C10  | 19.2(11) | 18.4(11) | 26.8(12) | 2.2(9)   | 5.6(9)   | -3.8(9)  |
| C11  | 16.2(11) | 16.2(10) | 23.4(11) | 0.6(9)   | 4.7(8)   | -2.4(8)  |
| C12  | 17.8(11) | 16.2(10) | 28.5(12) | -1.1(9)  | 9.2(9)   | 0.9(8)   |
| C13  | 13.2(10) | 17.1(10) | 16.8(10) | 0.8(8)   | 2.9(8)   | -1.0(8)  |
| C14  | 13.3(10) | 20.5(11) | 16.7(10) | 1.7(8)   | 2.9(8)   | -2.9(8)  |
| C15  | 26.1(13) | 22.2(12) | 25.5(12) | -2.3(10) | 7.8(10)  | -9.5(10) |
| C16  | 13.9(10) | 21.0(11) | 20.2(11) | -0.1(9)  | 3.7(8)   | -3.0(8)  |
| N17  | 12.5(9)  | 17.2(9)  | 33.0(11) | 1.3(8)   | 7.8(8)   | -2.0(7)  |
| C18  | 13.8(10) | 16.3(10) | 18.8(10) | 0.8(8)   | 3.4(8)   | -1.9(8)  |
| C19  | 15.3(10) | 19.6(11) | 26.3(12) | -0.7(9)  | 9.8(9)   | 1.4(8)   |
| C20  | 10.6(9)  | 20.2(11) | 17.9(10) | 0.5(8)   | 3.7(8)   | -1.1(8)  |
| C21  | 13.8(10) | 20.4(11) | 28.4(12) | -1.3(9)  | 9.8(9)   | -0.5(8)  |
| C22  | 20.2(12) | 27.7(13) | 45.2(17) | -8.8(12) | 13.2(11) | -5.3(10) |

**Table S4c** Bond Lengths for Compound [3].

| Atom | Atom | Length/ $\text{\AA}$ | Atom | Atom | Length/ $\text{\AA}$ |
|------|------|----------------------|------|------|----------------------|
| C11  | C14  | 1.788(2)             | C10  | C15  | 1.511(4)             |
| C12  | C15  | 1.788(3)             | C10  | N17  | 1.451(3)             |
| C3   | N4   | 1.317(3)             | C11  | C20  | 1.438(3)             |
| C3   | N6   | 1.317(3)             | C12  | C13  | 1.409(3)             |
| N4   | C14  | 1.334(3)             | C12  | C21  | 1.385(3)             |
| O5   | C16  | 1.240(3)             | C13  | C19  | 1.406(3)             |
| N6   | C7   | 1.460(3)             | C13  | C20  | 1.479(3)             |
| N6   | C22  | 1.456(3)             | C14  | C20  | 1.376(3)             |
| C8   | C18  | 1.402(3)             | C16  | N17  | 1.345(3)             |
| C8   | C19  | 1.382(3)             | C16  | C18  | 1.497(3)             |
| N9   | C11  | 1.155(3)             | C18  | C21  | 1.396(3)             |

**Table S4d** Bond Angles for compound [3].

| Atom | Atom | Atom | Angle/°    | Atom | Atom | Atom | Angle/°    |
|------|------|------|------------|------|------|------|------------|
| N6   | C3   | N4   | 121.6(2)   | C20  | C14  | C11  | 114.98(17) |
| C3   | N4   | C14  | 122.4(2)   | C10  | C15  | C12  | 109.67(18) |
| C3   | N6   | C7   | 122.0(2)   | O5   | C16  | N17  | 121.7(2)   |
| C3   | N6   | C22  | 121.5(2)   | O5   | C16  | C18  | 121.1(2)   |
| C22  | N6   | C7   | 116.5(2)   | N17  | C16  | C18  | 117.1(2)   |
| C19  | C8   | C18  | 120.8(2)   | C16  | N17  | C10  | 121.9(2)   |
| N17  | C10  | C15  | 110.0(2)   | C8   | C18  | C16  | 124.3(2)   |
| N9   | C11  | C20  | 175.2(3)   | C21  | C18  | C8   | 117.8(2)   |
| C21  | C12  | C13  | 120.7(2)   | C21  | C18  | C16  | 117.9(2)   |
| C12  | C13  | C20  | 123.6(2)   | C8   | C19  | C13  | 121.7(2)   |
| C19  | C13  | C12  | 117.3(2)   | C11  | C20  | C13  | 115.4(2)   |
| C19  | C13  | C20  | 119.1(2)   | C14  | C20  | C11  | 118.1(2)   |
| N4   | C14  | C11  | 119.39(18) | C14  | C20  | C13  | 126.5(2)   |
| N4   | C14  | C20  | 125.6(2)   | C12  | C21  | C18  | 121.7(2)   |

**Table S4e** Hydrogen Atom Coordinates ( $\text{\AA} \times 10^4$ ) and Isotropic Displacement Parameters ( $\text{\AA}^2 \times 10^3$ ) for Compound [3].

| Atom | x       | y       | z       | U(eq) |
|------|---------|---------|---------|-------|
| H3   | 6109.95 | 325.48  | 3804.6  | 23    |
| H7A  | 7087.89 | -785.45 | 3401.17 | 41    |
| H7B  | 8320.98 | -671.18 | 4065.02 | 41    |
| H7C  | 7877.26 | -658.88 | 2035.13 | 41    |
| H8   | 6313.92 | 5190.74 | 4058.84 | 23    |
| H10A | 8160.7  | 7113.67 | 2554.81 | 26    |
| H10B | 8978.72 | 6539.77 | 1829.94 | 26    |
| H12  | 7357.84 | 2597.66 | 2960.21 | 24    |
| H15A | 9863.08 | 6314.37 | 4728.62 | 29    |
| H15B | 9038.26 | 6878    | 5466.61 | 29    |
| H17  | 7311.03 | 6041.98 | 3381.95 | 25    |
| H19  | 5236.88 | 4132.38 | 4553.17 | 24    |
| H21  | 8431    | 3662.1  | 2475.16 | 24    |
| H22A | 8237.83 | 1184.93 | 1930.8  | 45    |
| H22B | 9048.92 | 516.1   | 2715.51 | 45    |
| H22C | 8696.42 | 1179    | 3955.44 | 45    |

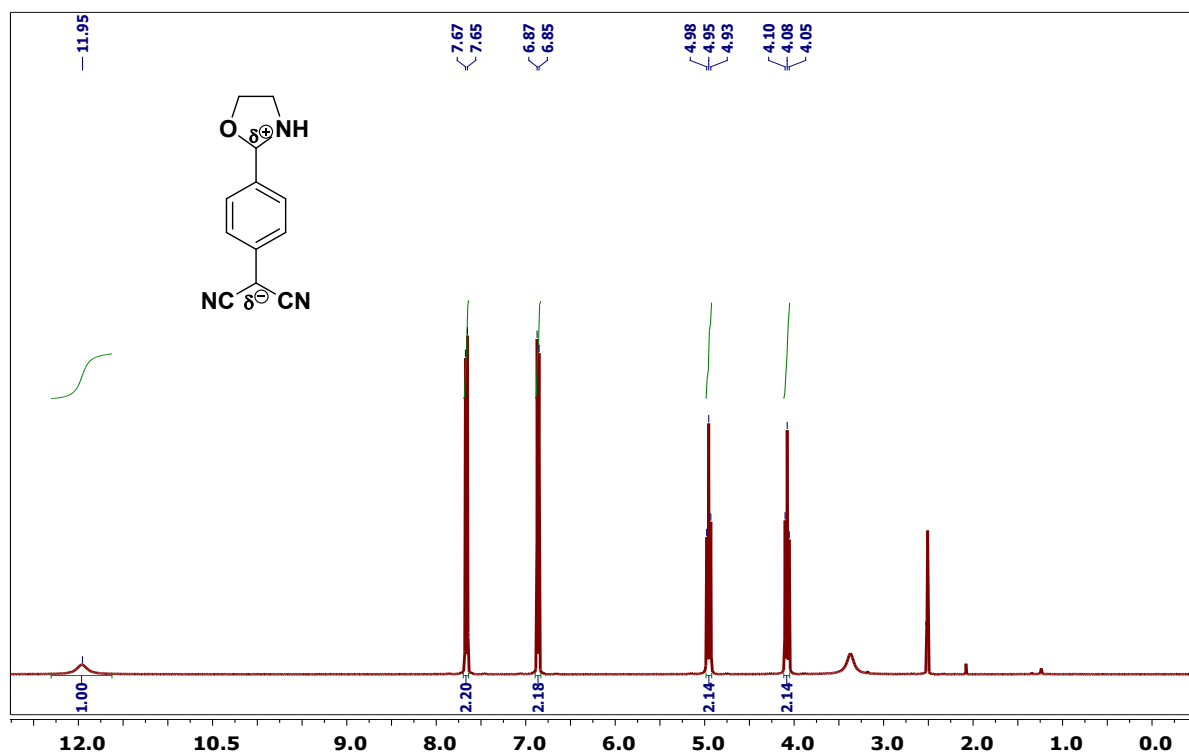

Fig. S2a <sup>1</sup>H NMR of compound [1].

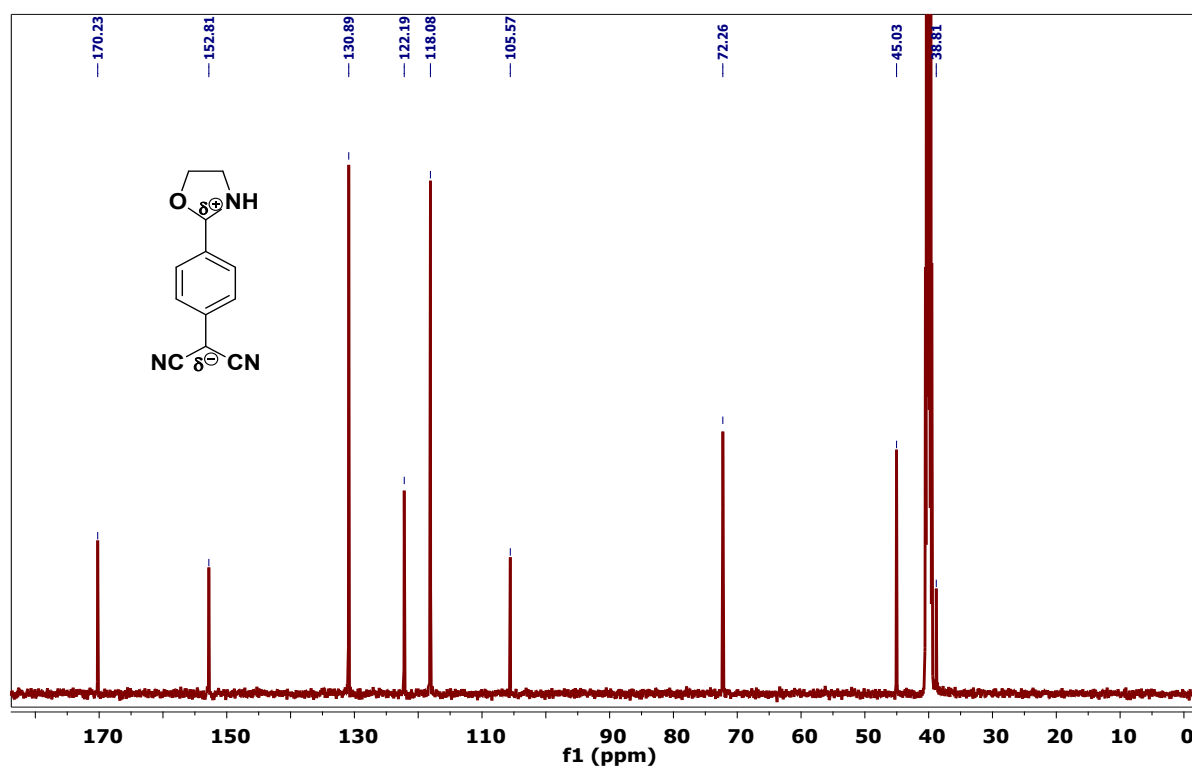

Fig. S2b <sup>13</sup>C NMR of compound [1].

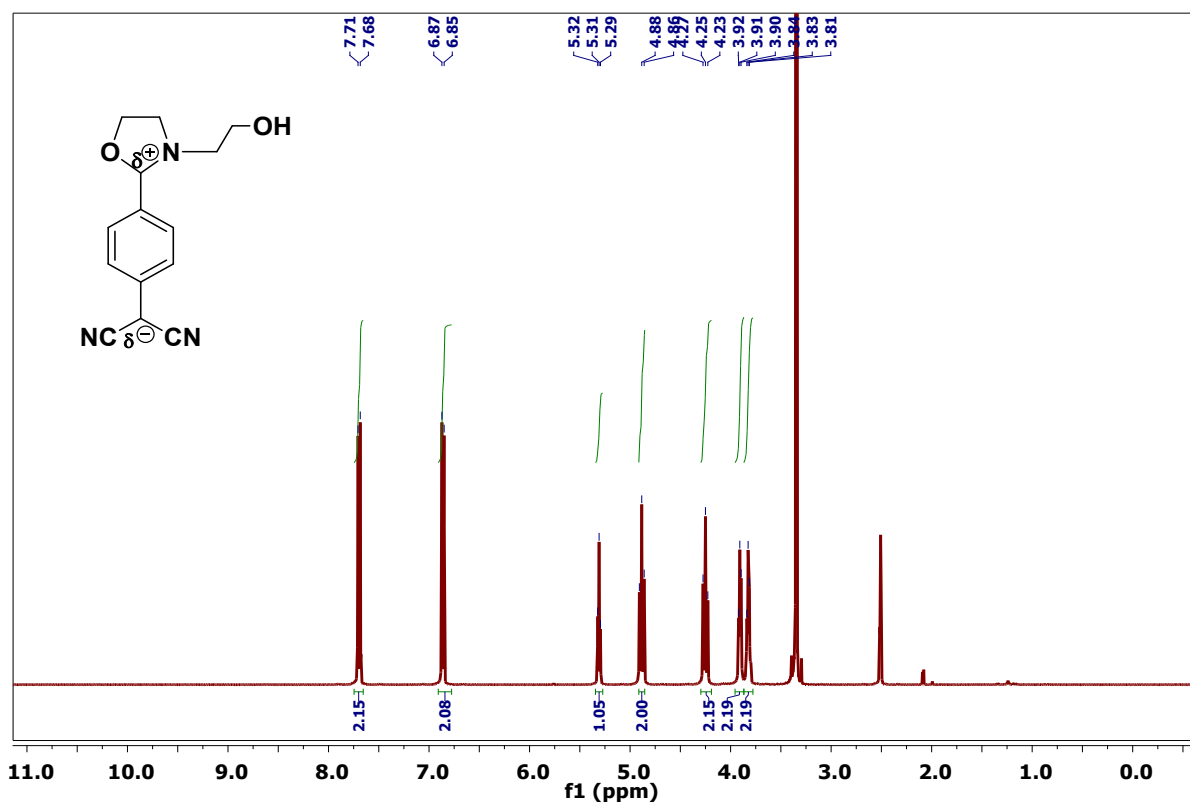

Fig. S3a  $^1\text{H}$  NMR of compound [2].

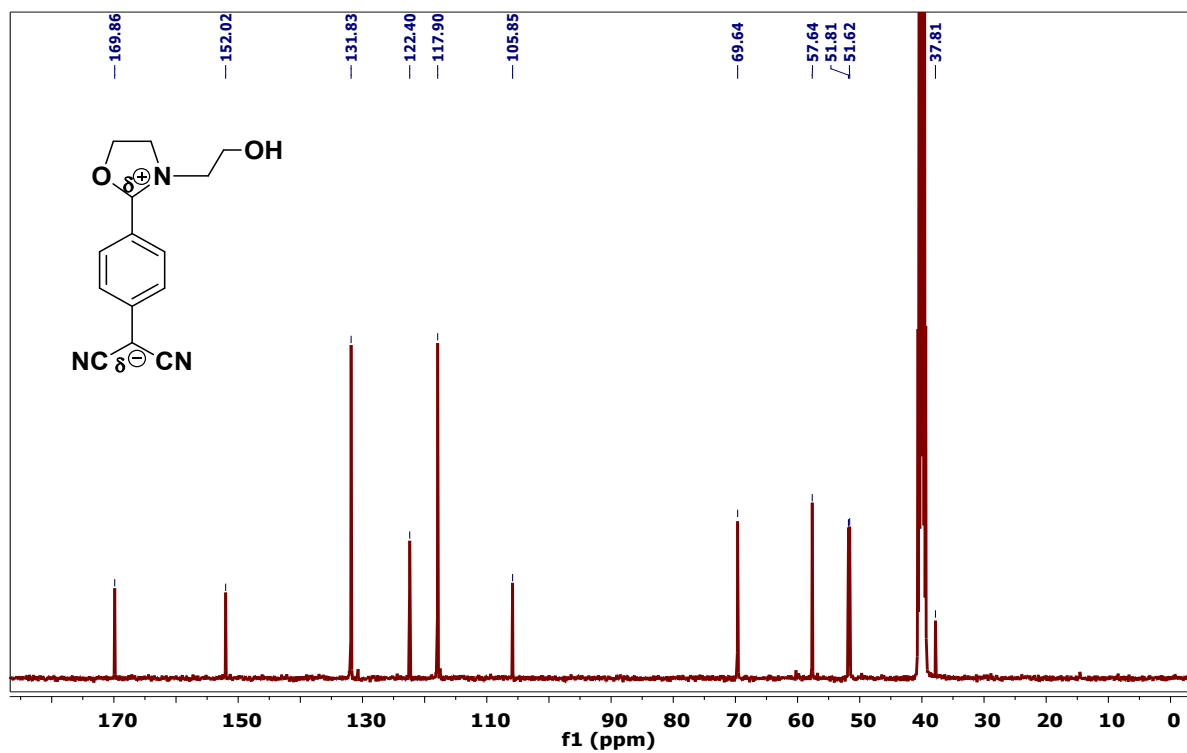

Fig. S3b  $^{13}\text{C}$  NMR of compound [2].

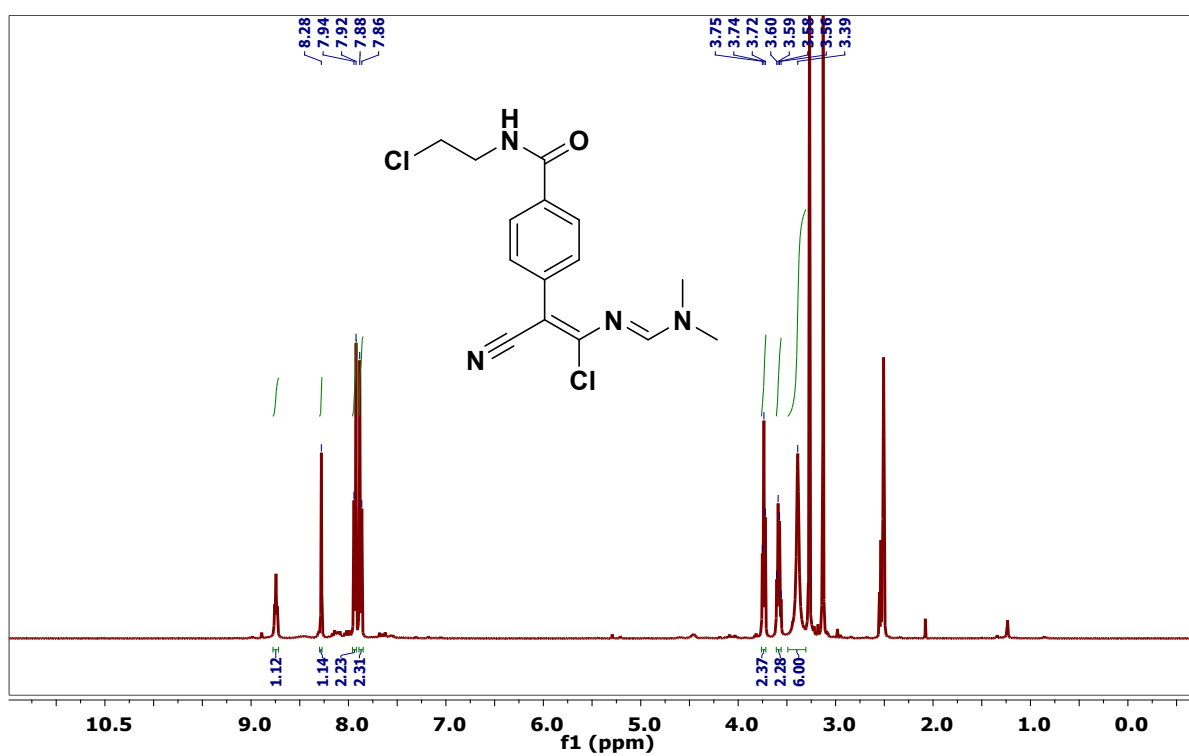

Fig. S4a <sup>1</sup>H NMR of compound [3].

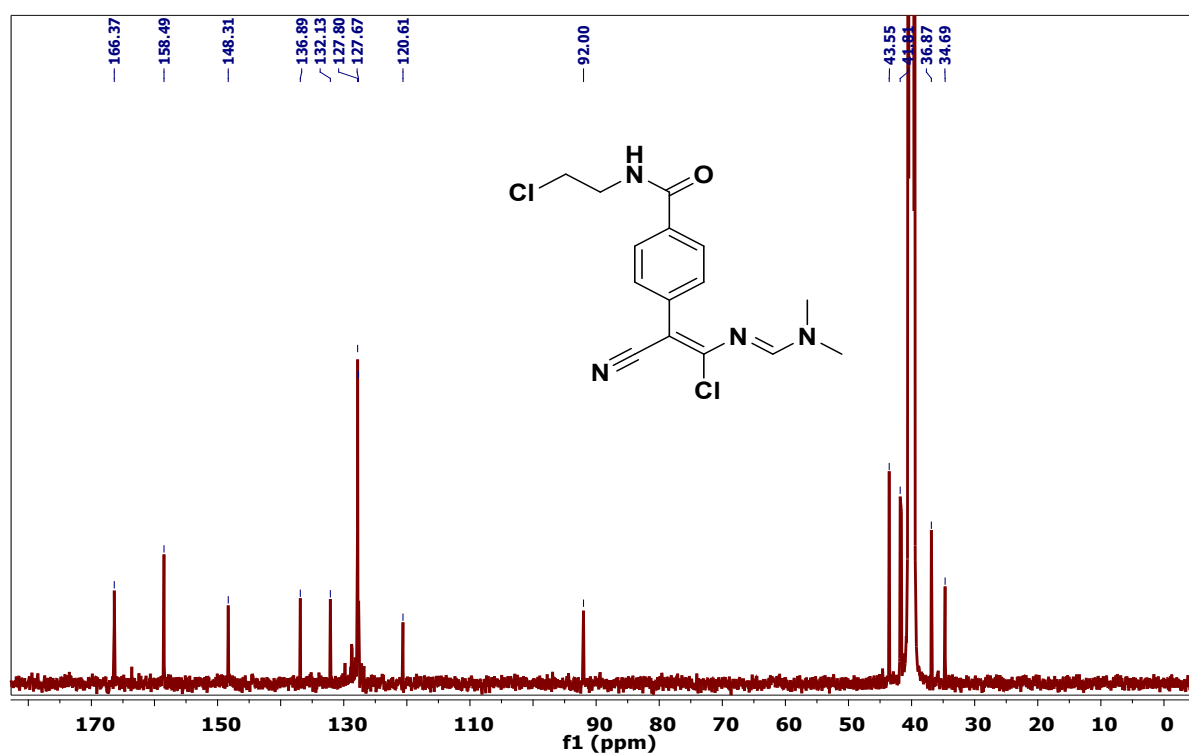

Fig. S4b <sup>13</sup>C NMR of compound [3].

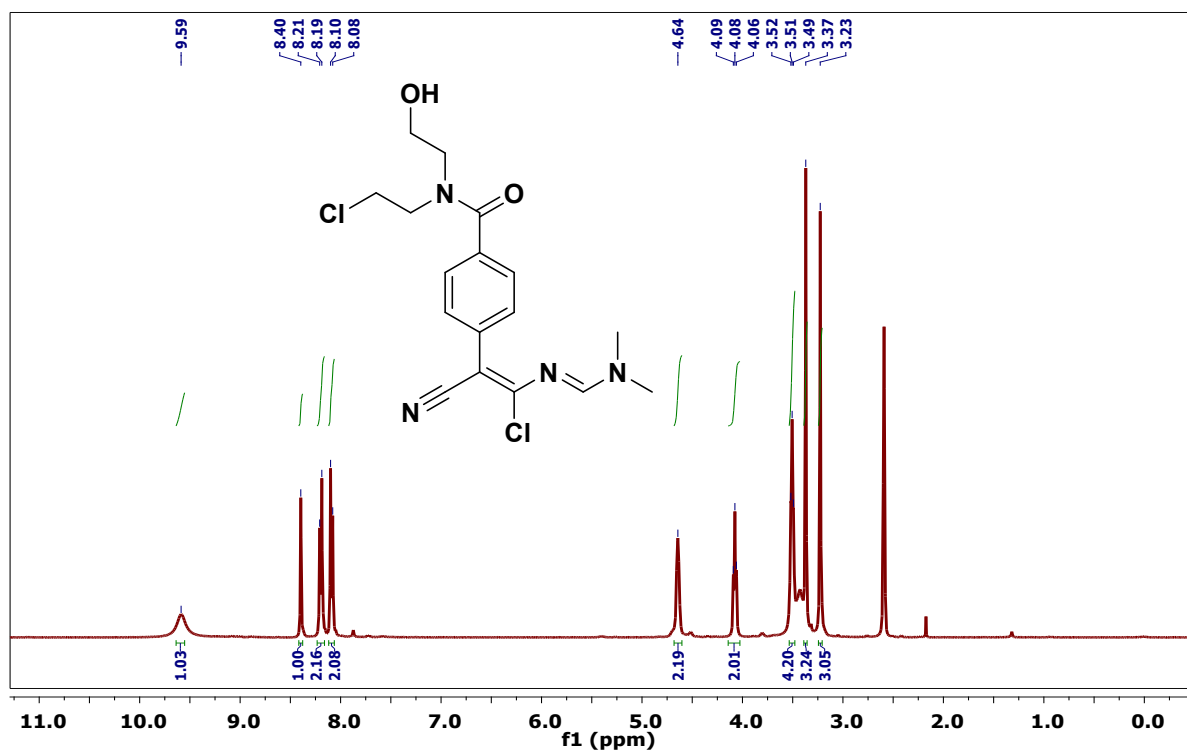

Fig. S5a  $^1\text{H}$  NMR of compound [4].

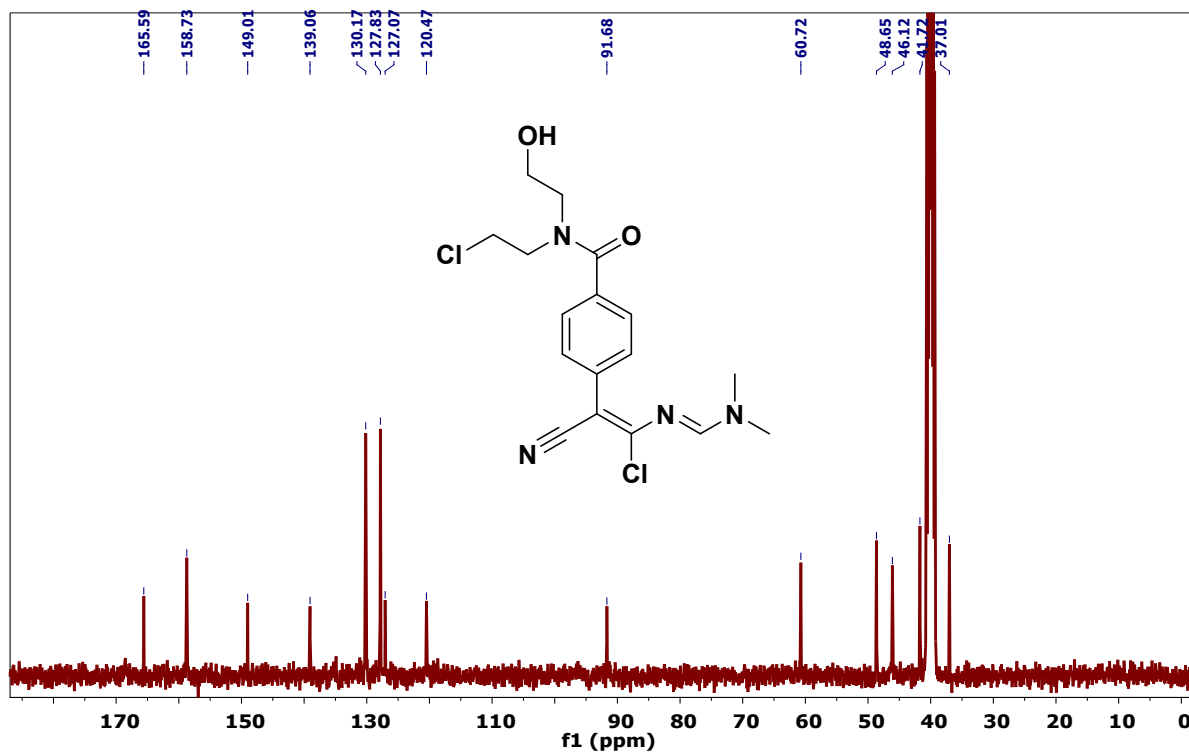

Fig. S5b  $^{13}\text{C}$  NMR of compound [4].

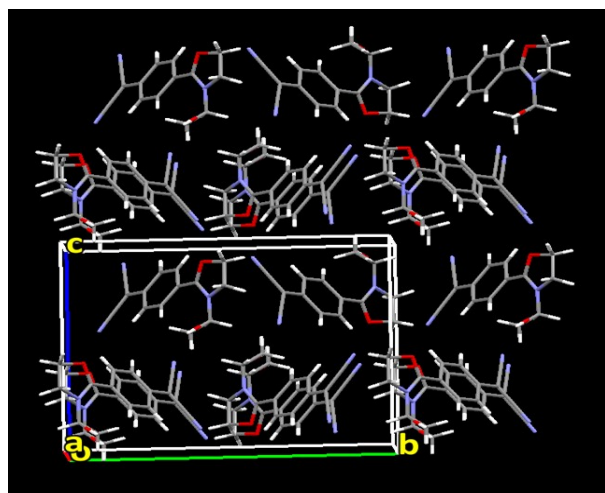

**Fig. S6** Molecular dipoles of [2] arranged in head-tail fashion, zig-zag orientation along the axis *ob*; as arrays along *oa*.

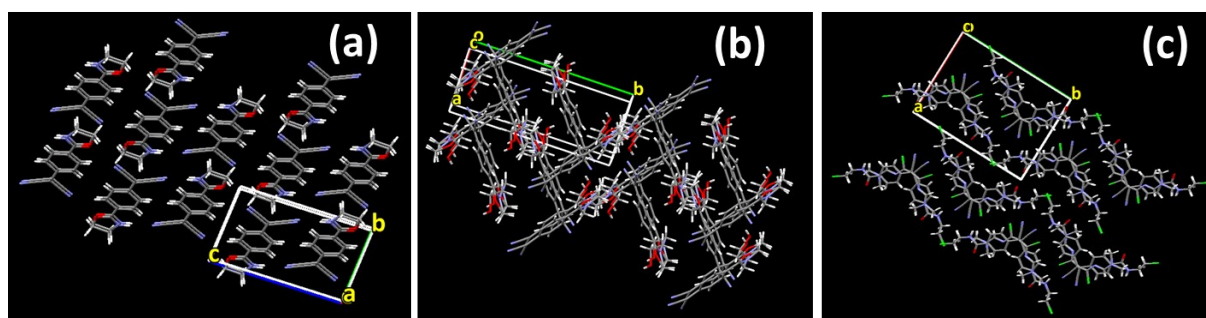

**Fig. S7** Supramolecular assemblies in [1], [2] and [3].

**Table S5** Absorption, emission wavelengths, corresponding stokes shift and quantum yields of compound [1] in various solvents.

| S.No. | Solvent/State | $\lambda_{abs}$ | $\lambda_{emi}$ | Stokes shift (nm) | Quantum yield (%) |
|-------|---------------|-----------------|-----------------|-------------------|-------------------|
| 1     | MeCN          | 433             | 480             | 47                | 0.04              |
| 2     | MeOH          | 427             | 470             | 43                | 0.04              |
| 3     | EtOH          | 420             | 466             | 46                | 0.18              |
| 4     | IPA           | 435             | 470             | 35                | 0.21              |
| 5     | THF           | 455             | 488             | 33                | 0.05              |
| 6     | DMF           | 428             | 468             | 40                | 0.20              |
| 7     | DMSO          | 429             | 475             | 46                | 0.35              |
| 8     | <b>Solid</b>  | 450             | 498             | 48                | <b>3.8</b>        |

**Table S6** Absorption, emission wavelengths, corresponding stokes shift and quantum yields of compound [3] in different solvents.

| S.No. | Solvent/State | $\lambda_{abs}$ | $\lambda_{emi}$ | Stokes shift (nm) | Quantum yield (%) |
|-------|---------------|-----------------|-----------------|-------------------|-------------------|
| 1     | MeCN          | 355             | 425, 403        | 70, 48            | 0.2               |
| 2     | MeOH          | 354             | 427, 404        | 73, 50            | 0.58              |
| 3     | EtOH          | 356             | 430, 405        | 74, 49            | 1.85              |
| 4     | IPA           | 355             | 427, 401        | 72, 46            | 0.9               |
| 5     | THF           | 355             | 430, 405        | 75, 50            | 0.12              |
| 6     | DMF           | 360             | 430, 409        | 70, 49            | 1.53              |
| 7     | DMSO          | 363             | 435, 410        | 72, 47            | 0.1               |
| 8     | <b>Solid</b>  | 425             | 508             | 83                | <b>0.5</b>        |



**Table S7** Absorption, emission wavelengths, corresponding stokes shift and quantum yields of compound [4] in varied solvents.

| S.No. | Solvent/State | $\lambda_{\text{abs}}$ | $\lambda_{\text{emi}}$ | Stokes shift (nm) | Quantum yield (%) |
|-------|---------------|------------------------|------------------------|-------------------|-------------------|
| 1     | MeCN          | 362                    | 432, 405               | 70, 43            | 0.05              |
| 2     | MeOH          | 360                    | 427, 405               | 67, 45            | 0.25              |
| 3     | EtOH          | 360                    | 428, 403               | 68, 43            | 1.89              |
| 4     | IPA           | 360                    | 428, 403               | 68, 43            | 0.9               |
| 5     | THF           | 360                    | 430, 405               | 70, 45            | 0.09              |
| 6     | DMF           | 367                    | 432, 408               | 65, 41            | 1.22              |
| 7     | DMSO          | 368                    | 437, 415               | 69, 47            | 0.88              |
| 8     | <b>Solid</b>  | 405                    | 500                    | 95                | <b>0.45</b>       |

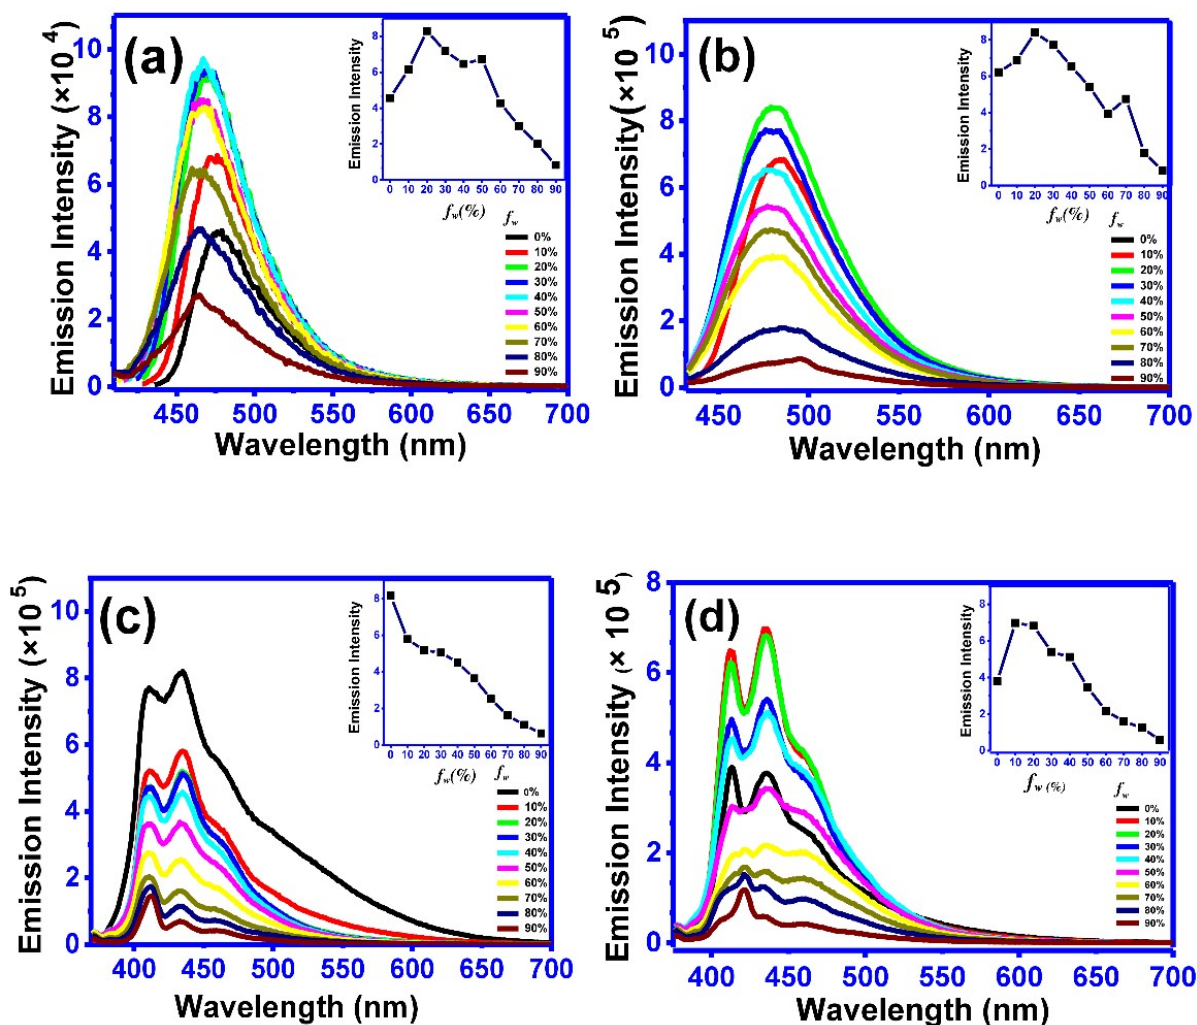

**Fig. S8** Decreased emission intensity on the addition of 0 to 90% water fraction to the 10 ppm DMSO solutions of compounds (a) [1], (b) [2], (c) [3] and (d) [4]; indicate aggregation quenching property.

**Table S8** X and Y coordinate values from the chromaticity output diagrams of all the compounds considered in this study.

| Compound | X Coordinate | Y Coordinate |
|----------|--------------|--------------|
| [1]      | 0.06         | 0.61         |
| [2]      | 0.37         | 0.56         |
| [3]      | 0.35         | 0.54         |
| [4]      | 0.34         | 0.56         |

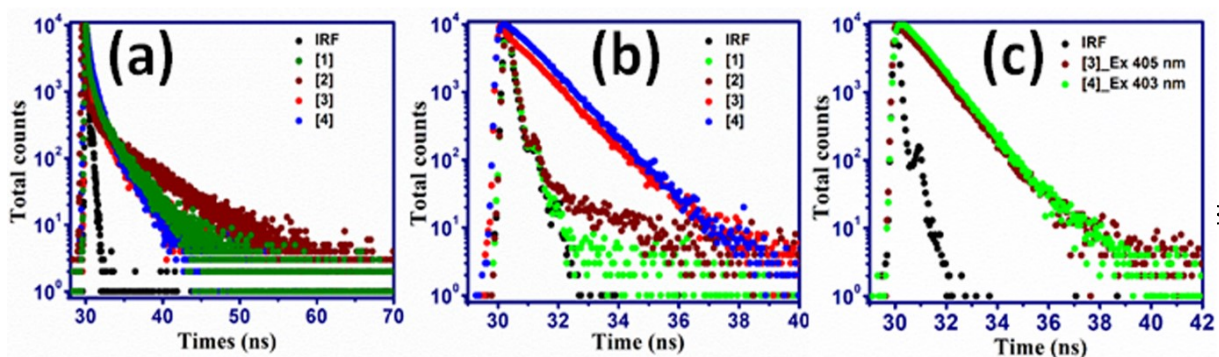

**Fig. S9** Fluorescence lifetime decay of compounds [1] to [4] in (a) solids (b) solutions and (c) represents the decay of [3] and [4] solutions (in ethanol) with  $\lambda_{em}$  of 405 nm and 403 nm.

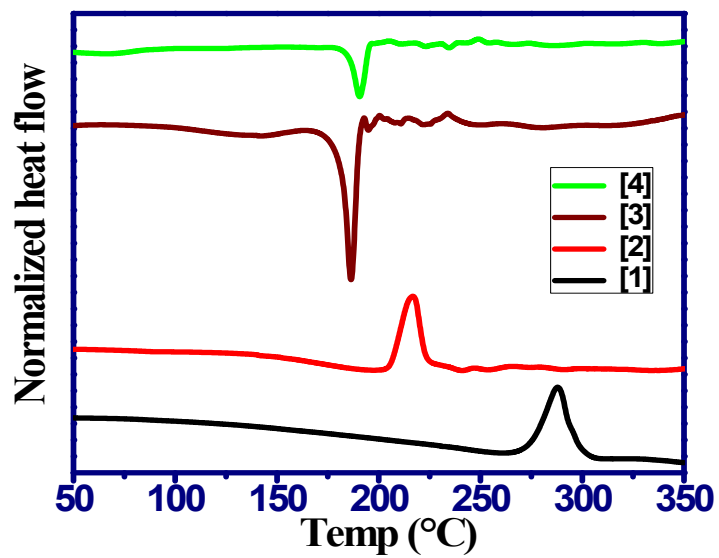

**Fig. S10** DSC plots of all four pure solids [1], [2], [3] and [4].
